# Supplementary material for: Salmon Erythrocytes Sequester Active Virus Particles in Infectious Salmon Anaemia
Source: MDPI journal article supplement (doi:10.3390/v14020310), 2022-02-02
Supplement: s1 [file s1]

## Supplementary Materials and Methods

**Table S1.** Primer/probe sets.

| Target                                                          |         | Primer/Probe Sets              |
|-----------------------------------------------------------------|---------|--------------------------------|
| Elongation factor 1 $\alpha$ <sup>1*</sup><br>(ELF-1 $\alpha$ ) | Forward | GGCTGGTTCAAGGGATGGA            |
|                                                                 | Reverse | CAGAGTCACACCATTGGCGTTA         |
|                                                                 | Probe   | FAM-TCGAGCGTAAGGATG-NFQ        |
| ELF-1 $\alpha$ <sup>1</sup>                                     | Forward | CCCCTCCAGGACGTTTACAAA          |
|                                                                 | Reverse | CACACGGCCCA-CAGGTACA           |
|                                                                 | Probe   | HEX-CTCTCTCATTGTGATCCC-MGB/NFQ |
| IFNa3-like, transcript<br>variants X1 and X2 <sup>1</sup>       | Forward | TGCAGTATGCAGAGCGTGTG           |
|                                                                 | Reverse | TCTCCTCCCATCTGGTCCAG           |
|                                                                 | Probe   | NA                             |
| Mx, transcript variant<br>X1 <sup>1</sup>                       | Forward | GGTGATAGGGGACCAGAGT            |
|                                                                 | Reverse | CTCCTCACGGTCTTGGTAGC           |
|                                                                 | Probe   | NA                             |
| Seg8 <sup>2</sup>                                               | Forward | CGAAAGCCCTGGAACTTTAGA          |
|                                                                 | Reverse | GATGCCGGAAGTCGATGAACT          |
|                                                                 | Probe   | FAM-AAGGCCATCGTCGCT-MGB/NFQ    |
| Seg8 <sup>2</sup>                                               | Forward | CTACACAGCAGGATGCAGATGT         |
|                                                                 | Reverse | CAGGATGCCGGAAGTCGAT            |
|                                                                 | Probe   | FAM-CATCGTCGCTGCAGTTC-MGB/NFQ  |
| Seg7 ORF1 <sup>2</sup>                                          | Forward | CAGGGTTGTATCCATGGTTGAAATG      |
|                                                                 | Reverse | GTCCAGCCCCTAAGCTCAACTC         |
|                                                                 | Probe   | FAM-GGGATCACAATGAGAGA-MGB/NFQ  |
| Seg7 ORF2 <sup>2</sup>                                          | Forward | ACGGAAAAGACAAGGTGGCTT          |
|                                                                 | Reverse | CCATCCTCCCCAGGAACCT            |
|                                                                 | Probe   | FAM-TTCCTGTCGGGCTCA-MGB/NFQ    |

<sup>1</sup> Atlantic salmon, <sup>2</sup> ISAV, NA = not applicable, \* primers also used without probes in SYBR green assay.

**Table S2.** Synthetic DNA used for standard curve (gBlocks).

| Targets                                                              | gBlock Sequence (Primer/Probe Targeted Sequences Underlined)                                                                                                                                                                                                                                                                                                                                                                                                                                                                           |
|----------------------------------------------------------------------|----------------------------------------------------------------------------------------------------------------------------------------------------------------------------------------------------------------------------------------------------------------------------------------------------------------------------------------------------------------------------------------------------------------------------------------------------------------------------------------------------------------------------------------|
| ELF-1 $\alpha$ <sup>1</sup> -<br>Seg8 <sup>2</sup>                   | CATGCTGGAGGCTAGCGCCAACATGGGCTGGTTCAAGGGATGGAAGGTCGAGCGTAAGGATGGTAACG<br><u>CCAATGGTGTGACTCTGCTGGAAGCCCTGGACGATGCAGATGTATGCTCTAGGAGCGAGTTCGAAAGCC</u><br><u>CTGGAAACTTTAGAAAAGGCCATCGTCGCTGCAGTTCATCGACTTCCGGCATC</u> CTGCTCGACAGAGAAG<br>ATGGTGCCAGGGTTGTATCCATGGTTGAAATGGACAGAGACGGCGTATCATTATCTACGAGAAGCCTA<br>GCATCTACCATAGTGATGGGTGCACTGGGACAGCATCGAGGGTCTGGAGACGGGATCACAATGAGAGA<br>GCTGGAGTTGAGCTTAGGGCTGGACTTCACTTCAGAA                                                                                                         |
| Seg7 ORF1 <sup>2</sup> -Seg7<br>ORF2 <sup>2</sup> -Seg8 <sup>2</sup> | AGCTAAGATTCTCCTTCTACAATGGATTTACCAAAGTGTATGGTGTGCTGGTTGACCAACTAAAACCTC<br><u>ACGGAAGAGACAAGGTGGCTTCTTTCCTGTCTGGGCTCAAAGGTTCTGGGGAGGATGGTATCTCAAGTA</u><br>CGTCAGGTATGCTGGACCTCTTGAAGGTGCTACACAGCAGGATGCAGATGTATGCTCTAGGAGCGAGTT<br><u>CGAAAGCCCTGGAACTTTAGAAAAGGCCATCGTCGCTGCAGTTCATCGACTTCCGGCATC</u> CTGCTCGA<br>CAGAGAAGATGGTGCCAGGGTTGTATCCATGGTTGAAATGGACAGAGACGGCGTATCATTATCTACGA<br>GAAGCCTAGCATCTACCATAGTGATGGGTGCACTGGGACAGCATCGAGGGTCTGGAGACGGGATCACA<br><u>ATGAGAGAGCTGGAGTTGAGCTTAGGGCTGGACTTCACTTCA</u> (GAA) <sup>3</sup> |

<sup>1</sup> Atlantic salmon, <sup>2</sup> ISAV, <sup>3</sup> One variant of this gBlock did not include the nucleotides in brackets.
